# Supplementary material for: Arthroscopic partial meniscectomy for a degenerative meniscus tear: a 5 year follow-up of the placebo-surgery controlled FIDELITY (Finnish Degenerative Meniscus Lesion Study) trial
Source: PubMed Central journal article supplement (PMC7606577; doi:10.1136/bjsports-2020-102813), 2020-08-27
Supplement: bjsports-2020-102813supp001.pdf [file bjsports-2020-102813supp001.pdf]

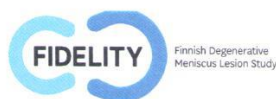

FIDELITY Trial: Minutes of the Blinded Data Interpretation meeting of the 5-yr follow-up

---

## Interpretation of Blinded Data, Statement of Interpretation

Clinical Epidemiology Unit, Orthopaedics, Department of Clinical Sciences Lund, Lund University, Lund, Sweden

Date: June 26, 2019 at 10:30.

### **Present:**

Aleksandra Turkiewicz, chair  
Martin Englund  
Pirjo Toivonen  
Simo Taimela  
Raine Sihvonen  
Velocity Hughes  
Teppo Järvinen, secretary

### **Background assumptions (theoretical basis/commitments and previous knowledge for data analysis and scientific goal of being objective and free of preconceptions)**

- 1) This superiority RCT has two research objectives:
  - a. to assess the long-term efficacy of arthroscopic partial meniscectomy (APM) (vs. placebo-surgery) in adult (age 35 to 65 years) patients with a degenerative meniscus tear; and
  - b. to determine the effects of APM on the development/progression of radiographic and clinical knee osteoarthritis (OA) in patients with a degenerative meniscus tear.

Both research objectives were registered in the ClinicalTrials.gov database as separate research questions (NCT00549172 and NCT01052233).
- 2) Accordingly, we have enrolled patients that represented optimal responders to this index surgical procedure. Also, surgeons carrying out the surgeries were highly experienced.
- 3) Conceding that the act of surgery *per se* produces a profound placebo response, a 'true' treatment effect is impossible to disentangle from the nonspecific (placebo or meaning) effects – such as the patients' or researchers' expectations of benefit – without a placebo comparison group.
- 4) The only difference between APM and placebo-surgery treatment groups is that the removal of torn segments of medial meniscus (partial meniscectomy) – the critical therapeutic (surgical) element – has been carried out for patients in the APM group.
  - a. The critical therapeutic (surgical) element is the component of the surgical procedure that is believed to provide the therapeutic effect (here, APM), being distinct from aspects of the procedures that are diagnostic or required to access the disease being treated (here, knee arthroscopy).

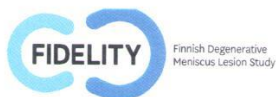

### FIDELITY Trial: Minutes of the Blinded Data Interpretation meeting of the 5-yr follow-up

- b. Apart from the critical therapeutic element, the treatment of the APM and placebo-surgery groups is identical, i.e., all “placebo or meaning effect” related to the entire treatment and care is identical.
- 5) Considering the above noted, to be deemed beneficial, APM has to be superior to placebo-surgery in one of the following two objectives and not inferior in the other, i.e.:
- APM should provide a statistically significant benefit over Placebo-surgery in at least one of the three primary outcomes and not to be inferior in the other two (NCT00549172).
  - APM should provide a benefit (delay the development/progression of) in radiographic knee OA (NCT01052233), either by showing:
    - A lower proportion of patients with development/progression of radiographic knee OA (development/progression defined as an increase of one grade or more in the Kellgren-Lawrence (KL) knee OA grading) or
    - A lower OARSI sum score (OARSI sum score is defined as the sum of marginal tibiofemoral osteophyte grades and tibiofemoral joint space narrowing (JSN) grades).

Given that the study was not powered for the latter objective (NCT01052233), the interpretation will be based on the effect sizes included in the 95% confidence intervals.

In the scenario that APM proves beneficial in either of the two objectives, but inferior in the other, then we will proceed into careful consideration of the benefit/harm -ratio based on effect sizes.

Accordingly, our interpretation scheme is as follows:

|                 | Beneficial |   |   | No difference | Harmful |   |   | Inconclusive |   |
|-----------------|------------|---|---|---------------|---------|---|---|--------------|---|
| PROMS           | +          | + | 0 | 0             | -       | - | 0 | +            | - |
| Radiographic OA | +          | 0 | + | 0             | -       | 0 | - | -            | + |

+ denotes Benefit of APM; 0 denotes No difference; - denotes Harm of APM (relative to placebo-surgery)

We will also perform sensitivity analysis taking into account unblindings/surgeries carried out during the 5-year follow-up with particular emphasis on the high tibial osteotomies/knee arthroplasties (as they may have a relevant effect on the PROMs).

#### Statistical commitments for main interpretation:

- I-T-T is the primary data analysis for both objectives, but sensitivity analysis will also be carried out in the case of “**Inconclusive**” findings.
- The prespecified time point of primary interest is 5 years after arthroscopy.

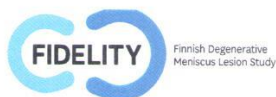

FIDELITY Trial: Minutes of the Blinded Data Interpretation meeting of the 5-yr follow-up

Lund, Sweden

June 26, 2019 at 11:45.

A handwritten signature in blue ink, appearing to read "Aleksandra Turkiewicz".

Aleksandra Turkiewicz, chair

A handwritten signature in blue ink, appearing to read "Raine Sihvonen".

Raine Sihvonen

A handwritten signature in blue ink, appearing to read "Pirjo Toivonen".

Pirjo Toivonen

A handwritten signature in blue ink, appearing to read "Martin Englund".

Martin Englund

A handwritten signature in blue ink, appearing to read "Simo Taimela".

Simo Taimela

A handwritten signature in blue ink, appearing to read "Teppo Järvinen".

Teppo Järvinen, secretary

A handwritten signature in blue ink, appearing to read "Velocity Hughes".

Velocity Hughes, External observer



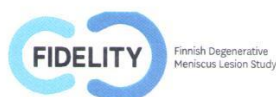

## FIDELITY Trial: Minutes of the Blinded Data Interpretation meeting of the 5-yr follow-up

---

### **MINUTES OF THE “BLINDED REVIEW OF THE DATA”**

The Writing committee of the FIDELITY trial (undersigned, below) developed and recorded two interpretations of the results on the basis of a blinded review of the primary outcome data (treatment A compared with treatment B), with one assuming that A was the Arthroscopic partial meniscectomy (APM) group and another assuming that A was the Placebo-surgery group.

The meeting started on June 26, 2019, at 12:00. All Writing Committee members were present and statistician Aleksandra Turkiewicz (AT) began to present the results. AT had coded the Groups as Group A and Group B and at this point, she was the only one aware of the allocation codes of the groups. Also, as Dr. Sihvonen and research coordinator Pirjo Toivonen had previous access to the data, they recused themselves from making any interpretations.

### **General principles for blinded results presentation**

The current results are for 3- to 5-year follow-up. The results from 1- and 2-year follow-ups, including baseline data, have already been published and known. These data were repeated when appropriate without blinding. However, the longer term follow-up data (from 3 to 5 years) were presented in blinded manner and not linked to any baseline, 1- or 2-year data to prevent unblinding. This is why the detailed results (with estimated regression coefficients for all parameters) were not shown, as this would lead to unblinding.

### **Data Presented by the Statistician**

The data shown in blinded data interpretation (AT’s Powerpoint presentation) is attached as an appendix to this document.

### **Primary Comparison**

#### Objective 1: Efficacy of APM (NCT00549172):

While reviewing the blinded results, the undersigned noted that there is no statistically significant (nor clinically relevant) difference in any of the three primary outcomes (Appendix, Table 6, below).

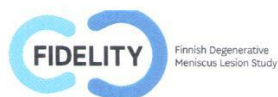

## FIDELITY Trial: Minutes of the Blinded Data Interpretation meeting of the 5-yr follow-up

**Table 6.** Results from statistical analyses – primary objective 1.

| Outcome                  | The <i>difference</i> between the groups (95%CI) at 5 years |
|--------------------------|-------------------------------------------------------------|
| WOMET                    | 1.7 (-4.3, 7.7)                                             |
| Lysholm knee score       | 2.1 (-2.6, 6.8)                                             |
| Knee pain after exercise | .04 (-0.72, 0.81)                                           |

### Objective 2: Development/progression of radiographic knee OA (NCT01052233):

While reviewing the blinded results, the undersigned noted that there is a consistent, slightly greater development/progression of radiographic OA in Group A (Appendix, Table 7, below).

**Table 7.** Results from statistical analyses – primary objective 2.

| Outcome                                                    | The <i>risk difference</i> between the groups (95%CI) at 5 years |
|------------------------------------------------------------|------------------------------------------------------------------|
| Radiographic <i>development/progression</i> of OA, 1 grade | -0.11 (-0.26, 0.05)                                              |

  

| Outcome             | The <i>difference in score</i> between the groups (95%CI) at 5 years |
|---------------------|----------------------------------------------------------------------|
| Sum of OARSI grades | -1.0 (-1.8, -0.3)                                                    |

Three persons who had a total knee replacement (TKR) during the follow-up had their radiological scores at 5 years set to KL grade 4 and OARSI sum score to 12. One person who had a high tibial osteotomy (HTO) had his/her radiological score at 5 years set to KL grade 3 and OARSI sum score to 9. These scores for TKR and HTO were pre-defined. As this can have an effect on both primary analyses (both PROMs and radiographical outcomes), we decided to carry out a sensitivity analysis to test the robustness of our findings.

### **Sensitivity analyses**

The exclusion of 4 people with TKR/HTO did not materially change the results (below).

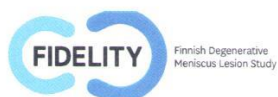

### FIDELITY Trial: Minutes of the Blinded Data Interpretation meeting of the 5-yr follow-up

Primary objective #1, included 142 persons

| Outcome                  | The <i>difference</i> between the groups (95%CI) at 5 years |
|--------------------------|-------------------------------------------------------------|
| WOMET                    | 1.8 (-4.1, 7.7)                                             |
| Lysholm knee score       | 2.3 (-2.4, 7.0)                                             |
| Knee pain after exercise | -0.01 (-0.79, 0.76)                                         |

Primary objective #2, included 137 persons with non-missing structural data

| Outcome                                             | The <i>risk</i> difference between the groups (95%CI) at 5 years     |
|-----------------------------------------------------|----------------------------------------------------------------------|
| Radiographic development/progression of OA, 1 grade | -0.10 (-0.26, 0.06)                                                  |
| Outcome                                             | The <i>difference in score</i> between the groups (95%CI) at 5 years |
| Sum of OARSI grades                                 | -0.7 (-1.4, -0.1)                                                    |

### Primary Interpretation of the Results

Accordingly, depending on group assignment, our findings suggest one of the two scenarios: APM does not have a beneficial effect on knee symptoms or function, but either 1) slightly accelerates or 2) slightly delays the development/progression of radiographic OA.

|                 | Beneficial | Harmful |
|-----------------|------------|---------|
| PROMS           | 0          | 0       |
| Radiographic OA | +          | -       |

+ denotes Benefit of APM; 0 denotes No difference; - denotes Harm of APM (relative to placebo-surgery)

Given the relatively small effect sizes and the uncertainty of our point estimates for the objective #2 (NCT01052233), our clinical interpretations will be primarily based on patient-relevant outcomes.

### Clinical implications of the findings

a) If Group A = APM and Group B = Placebo-surgery

Our results suggest that patients with a degenerative medial meniscus tear do not benefit from APM compared to placebo-surgery with respect to patient-relevant outcomes (knee symptoms and function) at 5 years after surgery. Further, APM may be associated with a slightly greater development/progression of radiographic OA. Taken together, these findings further strengthen the latest clinical practice guidelines making a strong recommendation against the use of APM in nearly all patients with a degenerative meniscus tear.



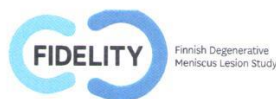

## FIDELITY Trial: Minutes of the Blinded Data Interpretation meeting of the 5-yr follow-up

---

b) If Group A = Placebo-surgery and Group B = APM

Our results suggest that patients with a degenerative medial meniscus tear do not benefit from APM compared to placebo-surgery with respect to patient-relevant outcomes (knee symptoms and function) at 5 years after surgery. However, APM may be associated with a slightly lesser development/progression of radiographic OA. Given that no benefit of APM was seen in the patient-relevant outcomes, we feel that our findings do not warrant a change in the latest clinical practice guidelines. However, these findings call for further studies on the possible protective effect of APM on the progression of OA and its potential mechanisms.

### **Analysis of the Secondary Outcomes**

Given the hypothesis-generating/explanatory nature of the secondary outcomes, they were not interpreted.

### **Unblinding the group assignment**

At 15:25 the randomization code was broken, revealing that Group A was APM and Group B was Placebo-surgery.

### **FINAL INTERPRETATION**

Blinded data interpretation was conducted as planned.

Our results suggest that patients with a degenerative medial meniscus tear do not benefit from APM compared to placebo-surgery with respect to patient-relevant outcomes (knee symptoms and function) at 5 years after surgery. Further, APM may be associated with a slightly greater development/progression of radiographic OA. Taken together, these findings further strengthen the latest clinical practice guidelines making a strong recommendation against the use of APM in nearly all patients with a degenerative meniscus tear.

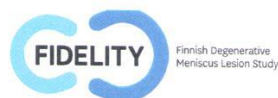

FIDELITY Trial: Minutes of the Blinded Data Interpretation meeting of the 5-yr follow-up

We hereby confirm that this document describes the course of events truthfully during the blinded data interpretation meeting of the FIDELITY trial.

Lund, June 26, 2019, at 15:32.

Aleksandra Turkiewicz, chair

Raine Sihvonen

Pirjo Toivonen

Martin Englund

Simo Taimela

Teppo Järvinen, secretary

### Appendices

1. Aleksandra Turkiewicz's Powerpoint presentation entitled: "FIDELITY trial 5-year follow-up assessments - blinded results"



15.4.2020

## **FIDELITY trial 5-year follow-up assessments - blinded results**

1

### **Outline**

- General considerations
- Descriptive data at baseline
- Descriptive data and inferential results for primary objective #1
- Descriptive data and inferential results for primary objective #2
- Descriptive data and inferential results for other outcomes

2

### **General principles for blinded results presentation**

The current results are for 3- to 5-year follow-up. The results from 1- and 2-year follow-ups, including baseline data, are already published and known. These data will be repeated when appropriate without blinding. However, the (3-, 4- and) 5-year outcomes will be presented in blinded manner and also not linked to any baseline, 1- or 2-year data to prevent unblinding. This is why the detailed results (with estimated regression coefficients for all parameters) are not shown, as this would lead to unblinding. The arms in the blinded results are named "Group A" and "Group B".

3

### **Data sources**

All the analyses are based on data/variables as listed in the document:  
FIDELITY\_5y\_data\_overview\_20190619.docx

4

1

15.4.2020

## Analysis plan

Analyses are based on analysis plan:  
SAP-FIDELITY 5-yr\_200619\_ME\_AT.doc

5

## Interpretation of the inferential results

The same arm (denoted as “Group A”) is used as reference group in all analyses. Interpretation of the results should be made in light of values included in the respective 95% CIs. For example, I suggest that a conclusion of “no difference” is made only when a 95% CI excludes any clinically relevant difference. If a 95% CI includes both small irrelevant differences and large, potentially clinically important differences, then the results may be inconclusive.

6

## Descriptive data, baseline

**Table 1A.** Characteristics at baseline (already known from previous publications):

| Characteristic                | APM         | Sham        |
|-------------------------------|-------------|-------------|
| Age (years), mean(SD)         | 52 (7.2)    | 52.1 (6.9)  |
| Sex, n(%)                     | 47 (60)     | 42 (60)     |
| KL grade 1*, baseline, n(%)   | 40 (50)     | 35 (50)     |
| Tampere, n(%)                 | 41 (54)     | 39 (56)     |
| Helsinki, n(%)                | 6 (8)       | 3 (4)       |
| Turku, n(%)                   | 9 (12)      | 8 (11)      |
| Jyväskylä, n(%)               | 6 (8)       | 8 (11)      |
| Kuopio, n(%)                  | 14 (18)     | 12 (17)     |
| Weight (kg), mean(SD)         | 83.2 (14.6) | 80.7 (14)   |
| Height (m), mean(SD)          | 172.6 (9.3) | 173.1 (8.4) |
| BMI, mean(SD)                 | 27.9 (4)    | 26.9 (4)    |
| WOMET, mean(SD)               | 52.8 (18.1) | 56.4 (17.3) |
| Lysholm score, mean(SD)       | 60.1 (14.6) | 60.2 (14.7) |
| Pain after exercise, mean(SD) | 6.1 (2)     | 5.8 (2)     |

\*according to original reading used for randomization purposes

7

## OARSI sum score

- Joint space narrowing, medial: 0-3
- Osteophytes, femur, medial: 0-3
- Osteophytes, tibia, medial: 0-3
- Joint space narrowing, lateral: 0-3
- Osteophytes, femur, lateral: 0-3
- Osteophytes, tibia, lateral: 0-3
- Sum score: 0-18

8

2

15.4.2020

## Descriptive data, baseline

**Table 1B.** Characteristics at baseline. KL grade (according to new readings) and OARSI sum score.

|                            | Group A   | Group B   |
|----------------------------|-----------|-----------|
| KL grade, (%)              |           |           |
| 0                          | 43        | 46        |
| 1                          | 30        | 20        |
| 2                          | 23        | 33        |
| 3                          | 3         | 1         |
| OARSI sum score, mean (SD) | 1.3 (1.5) | 1.1 (1.2) |

9

## Follow-up data, overview

**Table 2.** Missing data.

| Follow-up timepoints | Number of non-missing values |         |                     |            |              |                                       |
|----------------------|------------------------------|---------|---------------------|------------|--------------|---------------------------------------|
|                      | WOMET                        | Lysholm | Pain after exercise | K-L grades | OARSI grades | Clinical OA according to ACR criteria |
| Baseline             | 146                          | 146     | 146                 | 145        | 145          | Not applicable                        |
| 6 months             | 146                          | 145     | 146                 |            |              |                                       |
| 12 months            | 146                          | 145     | 146                 |            |              |                                       |
| 24 months            | 144                          | 143     | 144                 |            |              |                                       |
| 36 months            | 141                          | 138     | 140                 |            |              |                                       |
| 48 months            | 143                          | 143     | 143                 |            |              |                                       |
| 60 months            | 142                          | 141     | 142                 | 141        | 141          | 137                                   |

10

## Follow-up data, primary objectives #1

**Table 3.** Descriptive data on the study outcomes, PROM.

| Time point | WOMET, mean (SD) | Lysholm score, mean (SD) | Pain after exercise, mean (SD) |
|------------|------------------|--------------------------|--------------------------------|
| Baseline   | 54.5 (17.8)      | 60.2 (14.6)              | 6.0 (2.0)                      |
| 2 months   | 73.1 (21.1)      | 76.6 (16.3)              | 3.6 (2.5)                      |
| 6 months   | 80.4 (20.7)      | 82.7 (15.0)              | 2.8 (2.4)                      |
| 12 months  | 80.4 (20.8)      | 82.8 (14.6)              | 2.8 (2.5)                      |
| 24 months  | 83.8 (18.3)      | 84.7 (14.3)              | 2.3 (2.5)                      |
| 36 months  | 83.3 (18.9)      | 84.3 (14.5)              | 2.1 (2.3)                      |
| 48 months  | 84.1 (18.3)      | 84.5 (15.2)              | 2.2 (2.4)                      |
| 60 months  | 84.6 (18.7)      | 84.8 (15.8)              | 2.1 (2.5)                      |

11

## Follow-up data, primary objectives #1

**Table 4.** Descriptive data on the study outcomes, 3 to 5 years, per group.

| Time point | WOMET, mean (SD) |             | Lysholm score, mean (SD) |             | Pain after exercise, mean (SD) |           |
|------------|------------------|-------------|--------------------------|-------------|--------------------------------|-----------|
|            | Group A          | Group B     | Group A                  | Group B     | Group A                        | Group B   |
| 36 months  | 83.9 (17.7)      | 82.7 (20.2) | 84.5 (15.4)              | 84.1 (13.6) | 1.8 (2.2)                      | 2.3 (2.4) |
| 48 months  | 83.2 (19.8)      | 85.0 (16.9) | 83.0 (17.1)              | 85.9 (13.3) | 2.4 (2.5)                      | 2.0 (2.2) |
| 60 months  | 84.5 (18.5)      | 84.6 (19)   | 83.8 (17.2)              | 85.7 (14.5) | 2.0 (2.5)                      | 2.2 (2.4) |

12

3

15.4.2020

Analysis results, primary objective #1

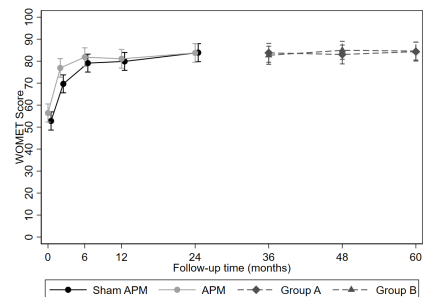

13

Analysis results, primary objective #1

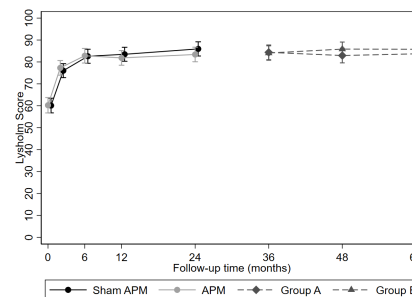

14

Analysis results, primary objective #1

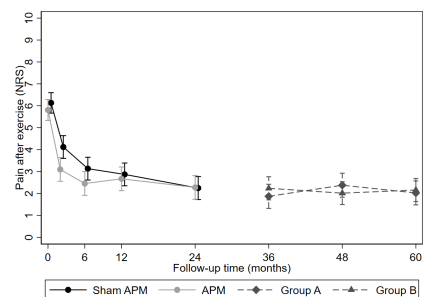

15

Analysis results, primary objective #1

**Table 6.** Results from statistical analyses – primary objective 1.

| Outcome                  | The difference between the groups (95%CI) at 5 years |
|--------------------------|------------------------------------------------------|
| WOMET                    | 1.7 (-4.3, 7.7)                                      |
| Lysholm knee score       | 2.1 (-2.6, 6.8)                                      |
| Knee pain after exercise | .04 (-0.72, 0.81)                                    |

16



15.4.2020

## Follow-up data, primary objective #2

**Table 5.** Summary of radiographic outcomes at 5 years (number of knee replacements presented only for all cohort to prevent potential unblinding):

| Outcome                                       | All       |                  | Group A          | Group B          |
|-----------------------------------------------|-----------|------------------|------------------|------------------|
|                                               | N         | %                | %                | %                |
| Progression in KL grades (at least 1 grade)   | 87        | 62               | 67               | 57               |
| Progression in KL grades (at least 0.5 grade) | 109       | 77               | 81               | 75               |
| Clinical knee OA according to ACR criteria    | 11        | 8                | 8                | 9                |
| Number of knee replacements or osteotomies    | 4         | 3                |                  |                  |
|                                               |           | <b>Mean (SD)</b> | <b>Mean (SD)</b> | <b>Mean (SD)</b> |
| OARSI sum score*                              | 3.2 (3.0) |                  | 4.0 (3.3)        | 2.8 (2.4)        |

\*Three persons had knee replacement during follow-up, their radiological scores at 5 years were set to KL grade 4 and OARSI sum score 12. One person had osteotomy, this person's radiological scores at 5 years were set to KL grade 3 and OARSI sum score 9.

17

## Follow-up data, primary objective #2

**Figure 1.** Overview of the difference in OARSI scores between 5 years and baseline, histogram.

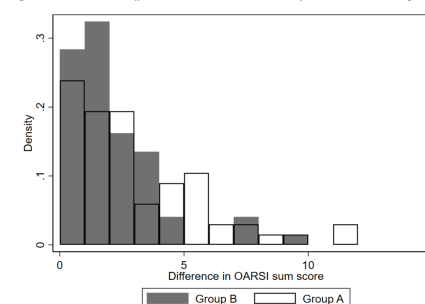

18

## Analysis results, primary objective #2

The results for *binary* outcomes are presented as risk differences, i.e. the difference between the groups in the proportion of persons with a given outcome at 5 years. For example, a difference of 0.1 means that the proportion of persons with an outcome in one group is 10% larger than in the other group (for example 30% and 20%, or 60% and 50%, respectively).

19

## Analysis results, primary objective #2

**Table 7.** Results from statistical analyses – primary objective 2.

| Outcome                                   | The risk difference between the groups (95%CI) at 5 years                            |
|-------------------------------------------|--------------------------------------------------------------------------------------|
| Radiographic progression of OA, 1 grade   | -0.1 (-0.26, 0.05)                                                                   |
| Radiographic progression of OA, 0.5 grade | -0.07 (-0.20, 0.07)                                                                  |
| Knee OA according to ACR criteria         | 0.01 (-0.08, 0.09)                                                                   |
| KR or osteotomy                           | Only descriptive due to few events, see above for summary for the whole study sample |
| Outcome                                   | The difference in score between the groups (95%CI) at 5 years                        |
| Sum of OARSI grades                       | -1.0 (-1.8, -0.3)                                                                    |

20

5
