# Supplementary material for: Arthroscopic partial meniscectomy for a degenerative meniscus tear: a 5 year follow-up of the placebo-surgery controlled FIDELITY (Finnish Degenerative Meniscus Lesion Study) trial
Source: Br J Sports Med. 2020 Aug 27;54(22):1332–9. doi: 10.1136/bjsports-2020-102813 (PMC7606577; doi:10.1136/bjsports-2020-102813)
Supplement: Supplementary data [file bjsports-2020-102813supp002.pdf]

## Appendix 2. Reliability of radiographic assessment of knee osteoarthritis

### A. Comparison of radiological readings between a consensus of two readers (consensus) and an independent, third reader (single reader).

| Outcome                                           | CONSENSUS            | SINGLE READER       |
|---------------------------------------------------|----------------------|---------------------|
| Radiographic <i>progression</i> of OA, 1 grade*   | -0.13 (-0.28, 0.02)  | -0.11 (-0.26, 0.05) |
| Radiographic <i>progression</i> of OA, 0.5 grade* | -0.14 (-0.26, -0.03) | -0.07 (-0.20, 0.07) |
| Sum of OARSI grades§                              | -0.7 (-1.3, -0.1)    | -1.0 (-1.8, -0.3)   |

\* The *risk difference* between the Sham APM and APM arm (95%CI) at 5 years

§ The *difference* between the Sham APM and APM (95%CI) at 5 years

### B. Agreement of Kellgren-Lawrence (KL) and OARSI grading by a consensus reading of two new readers vs. a single reader.

Please see the methods section for details on the procedure of radiographic readings.

We estimated the agreement of KL baseline scores, KL scores at 5 years and progression of at least 1 grade (primary outcome) and of at least 0.5 grades (outcome for sensitivity analysis) as well as difference in OARSI grades between 5 years and baseline (primary outcome).

For KL grades (ordinal data) we used weighted kappa with weights of the form  $1-|i-j|/4$  weights (i and j are rows and columns of the ratings). The progression of KL grades (binary outcome) we used unweighted kappa. The CIs for kappa are bias-corrected from 1000 bootstrap replicates.

For OARSI scores we estimated the intraclass correlation (ICC) treating the persons as random and readers as fixed, absolute agreement is reported.

| Outcome                                                | Consensus vs. Single reader |
|--------------------------------------------------------|-----------------------------|
| KL grades at baseline, weighted kappa (95%CI)          | 0.53 (0.43 - 0.63)          |
| KL grade at 5y follow-up, weighted kappa (95%CI)       | 0.58 (0.49 - 0.68)          |
| KL progression with at least 1 grade, kappa (95%CI)    | 0.27 (0.11 - 0.44)          |
| KL progression with at least 0.5 grade, kappa (95%CI)  | 0.44 (0.24 - 0.60)          |
| Difference in Sum OARSI score 5y-baseline, ICC (95%CI) | 0.77 (0.69 - 0.83)          |
